# Supplementary material for: Adsorption Characteristics of Antibiotic Meropenem on Magnetic CoFe2O4@Au Nanoparticles
Source: Hindawi journal article supplement (doi:10.1155/2022/9759759), 2022-01-01
Supplement: f1 [file 9759759.f1.docx]

**SUPPLEMENTARY MATERIALS**

**Adsorption characteristics of antibiotic meropenem on magnetic CoFe2O4@Au nanoparticles**

Thi Ngoc Mai Pham*1, Thi Hieu Hoang1, Thu Phuong Nguyen1, Quang Khanh Nguyen1,2, Bach Pham1, Quoc Anh Hoang1, Tien Duc Pham1, Thi Anh Huong Nguyen1, Anh Tuan Le3,4, Duc Thang Pham*3,4

1 Faculty of Chemistry, University of Science, Vietnam National University, Hanoi, 19 Le Thanh Tong, Hoan Kiem, Hanoi 10000, Viet Nam.

2 Department of Chemistry, College of Natural Sciences, Hanyang University, Seoul 04763, Korea.

3 Phenikaa University Nano Institute, Phenikaa University, Yen Nghia, Ha Dong, Hanoi 12116, Viet Nam.

4 Faculty of Materials Science and Engineering, Phenikaa University, Yen Nghia, Ha Dong, Hanoi 12116, Viet Nam.

*** Corresponding author:** [phamthingocmai@hus.edu.vn](mailto:phamthingocmai@hus.edu.vn), [thang.phamduc@phenikaa-uni.edu.vn](mailto:thang.phamduc@phenikaa-uni.edu.vn)

**Submission to:** Adsorption Science & Technology, Hindawi.


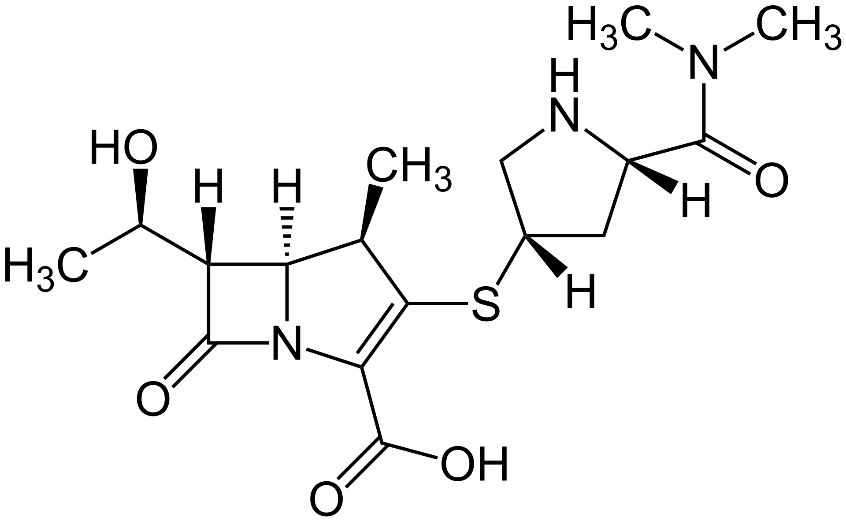


**Figure S1.** Chemical structure of meropenem.

Figure S2. Adsorption efficiencies of meropenem on C18, CFO, CFO@Au-citrate and CFO@Au-PDADMAC.


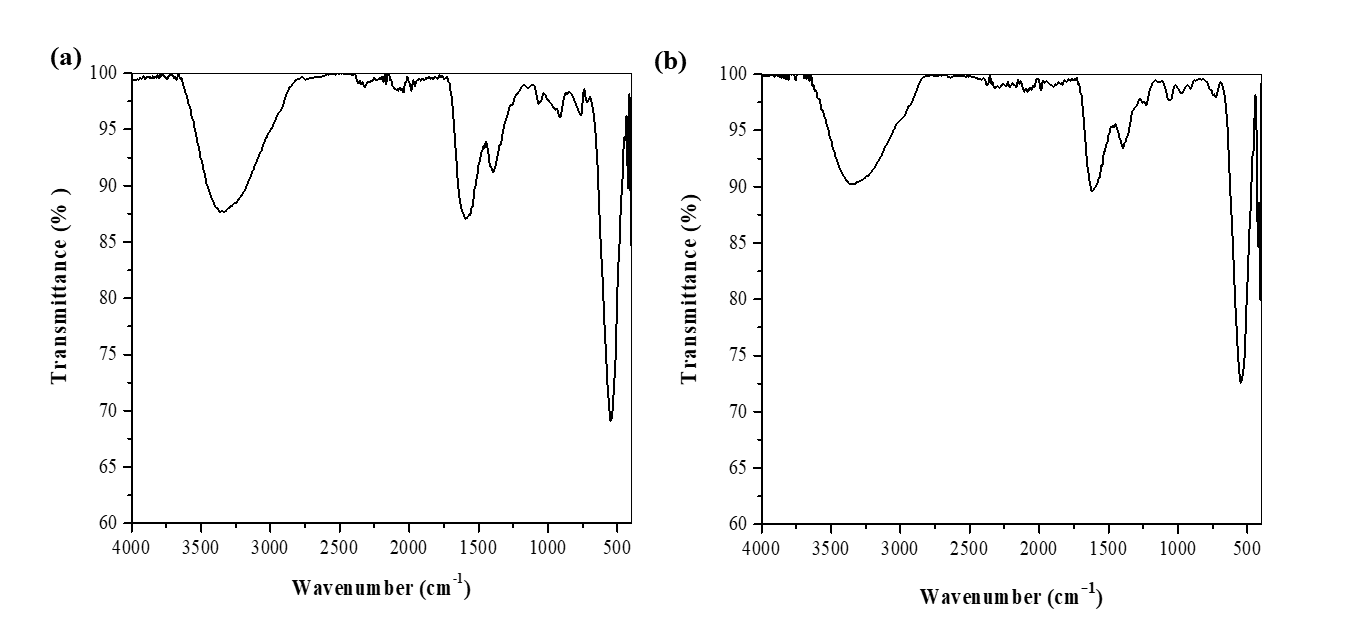


Figure S3. IR spectra of (a) CFO@Au; (b) CFO@Au@meropenem.

**Figure S4.** UV-Vis absorption spectra of (1) CFO, (2) AuNPs and (3) CFO@Au solution.


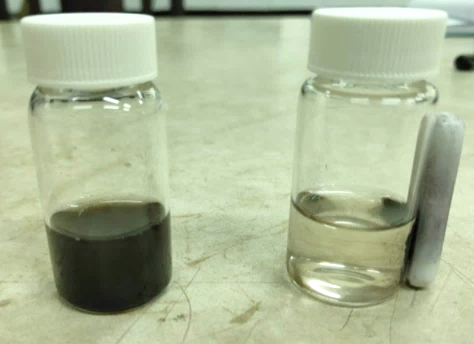


Figure S5. Separation of CFO@Au-meropenem from aqueous solution using a magnetic stirrer.

Figure S6. Intra-particle diffusion plots for the adsorption of meropenem.
